# Supplementary material for: Circulating Phylotypes of White Spot Syndrome Virus in Bangladesh and Their Virulence
Source: MDPI journal article supplement (doi:10.3390/microorganisms10010191), 2022-01-16
Supplement: s1 [file s1]

**Table S1.** Physicochemical parameters in the shrimp ponds when no WSSV was reported in the areas.

| Gher ID | Salinity (ppt) | Dissolved Oxygen (ppm) | Temperature (°C) | pH   | Shrimp samples collected | Crab samples collected | WSSV-positive shrimp (%) | WSSV-positive crab (%) |
|---------|----------------|------------------------|------------------|------|--------------------------|------------------------|--------------------------|------------------------|
| SS1     | 18             | 4.79                   | 29.2             | 8.5  | 6                        | 2                      | 0                        | 0                      |
| SS2     | 16             | 3.12                   | 29.2             | 8.6  | 6                        | 2                      | 0                        | 0                      |
| SS3     | 19             | 2.61                   | 29               | 8.5  | 6                        | 2                      | 0                        | 0                      |
| D1      | 20             | 5.57                   | 29.9             | 8.5  | 6                        | 2                      | 0                        | 0                      |
| D2      | 17             | 6.06                   | 30               | 8.5  | 6                        | 2                      | 0                        | 0                      |
| D3      | 18             | 5.10                   | 29.7             | 9.1  | 6                        | 2                      | 0                        | 0                      |
| A1      | 19             | 4.2                    | 30               | 8.67 | 6                        | 2                      | 0                        | 0                      |
| A2      | 19             | 3.05                   | 30.2             | 8.45 | 6                        | 2                      | 0                        | 0                      |
| A3      | 19             | 2.46                   | 30.3             | 8.5  | 6                        | 2                      | 0                        | 0                      |
| K1      | 15             | 5.62                   | 32.2             | 8.2  | 6                        | 2                      | 0                        | 0                      |
| K2      | 20             | 7.67                   | 33.2             | 8.5  | 6                        | 2                      | 0                        | 0                      |
| K3      | 19             | 6.05                   | 33.7             | 8.8  | 6                        | 2                      | 0                        | 0                      |
| S1      | 17             | 5.85                   | 29.6             | 8.5  | 6                        | 2                      | 0                        | 0                      |
| S2      | 16             | 5.88                   | 28.7             | 8.6  | 6                        | 2                      | 0                        | 0                      |
| S3      | 20             | 5.37                   | 28.9             | 8.4  | 6                        | 2                      | 0                        | 0                      |
| Cox1    | 19             | 4.9                    | 30.0             | 8.7  | 6                        | 2                      | 0                        | 0                      |
| Cox2    | 18             | 5.20                   | 30.1             | 8.6  | 6                        | 2                      | 0                        | 0                      |
| Cox3    | 19             | 5.00                   | 30.0             | 8.6  | 6                        | 2                      | 0                        | 0                      |
| Cox4    | 19             | 4.5                    | 30.3             | 8.5  | 6                        | 2                      | 0                        | 0                      |
| Cox5    | 17             | 4.5                    | 30               | 8.6  | 6                        | 2                      | 0                        | 0                      |
