# Supplementary material for: Circulating Phylotypes of White Spot Syndrome Virus in Bangladesh and Their Virulence
Source: MDPI journal article supplement (doi:10.3390/microorganisms10010191), 2022-01-16
Supplement: s1 [file s1]

**Table S2.** C<sub>T</sub> values and mean WSSV copies from the quantitative real-time PCR of crab ingestion challenge pilot experiment (E and G prefixes of Sample IDs represent samples challenged with BD1 and BD2).

| ID | CT        | CT        | CT        | CT mean     | CT SD | Mean WSSV copies per gram |
|----|-----------|-----------|-----------|-------------|-------|---------------------------|
| G1 | 35.137949 | 34.823678 | 35.00544  | 34.98902249 | 0.158 | 2.56x10 <sup>9</sup>      |
| G2 | 32.150755 | 32.057954 | 32.362684 | 32.19046422 | 0.156 | 1.62x10 <sup>10</sup>     |
| G3 | 33.342938 | 33.252047 | 33.744374 | 33.44645309 | 0.262 | 7.04x10 <sup>9</sup>      |
| G4 | 31.815467 | 31.729114 | 31.687042 | 31.74387431 | 0.065 | 2.06x10 <sup>10</sup>     |
| G5 | 33.810558 | 33.733273 | 34.251021 | 33.93161766 | 0.279 | 4.67x10 <sup>9</sup>      |
| G6 | 31.842761 | 31.401744 | 32.359593 | 31.86803256 | 0.479 | 1.89x10 <sup>10</sup>     |
| E1 | 26.871992 | 26.670694 | 26.648922 | 26.73053588 | 0.123 | 7.10x10 <sup>11</sup>     |
| E2 | 31.953898 | 25.723672 | 26.080568 | 27.91937927 | 3.499 | 3.02x10 <sup>11</sup>     |
| E3 | 27.238455 | 27.081096 | 27.249458 | 27.18966927 | 0.094 | 5.42x10 <sup>11</sup>     |
| E4 | 24.774002 | 26.646636 | 26.707501 | 26.04271329 | 1.099 | 1.07x10 <sup>12</sup>     |
| E5 | 23.993787 | 23.685243 | 23.821705 | 23.83357793 | 0.155 | 4.61x10 <sup>12</sup>     |
| E6 | 23.51504  | 23.944252 | 24.26711  | 23.90880065 | 0.377 | 4.27x10 <sup>12</sup>     |
